# Supplementary material for: Microcystin Concentrations, Partitioning, and Structural Composition during Active Growth and Decline: A Laboratory Study
Source: MDPI journal article supplement (doi:10.3390/toxins15120684), 2023-12-06
Supplement: s1 [file s1]

# Supplementary Materials: Microcystin Concentrations, Partitioning, and Structural Composition during Active Growth and Decline: A Laboratory Study

**Table S1.** Sampling sites along the Chowan River, NC.

| Site | Full Name       | Date       | Latitude | Longitude |
|------|-----------------|------------|----------|-----------|
| AH   | Arrowhead       | 07/16/2019 | 36.23    | -76.71    |
| CR   | Colerain        | 07/16/2019 | 36.20    | -76.75    |
| IR   | Indian River    | 07/31/2019 | 36.23    | -76.70    |
| LL   | Leary's Landing | 07/31/2019 | 36.14    | -76.75    |
| MC   | Modoc Canal     | 08/13/2019 | 36.22    | -76.71    |
| CP   | Charlton Pier   | 09/11/2019 | 36.14    | -76.75    |

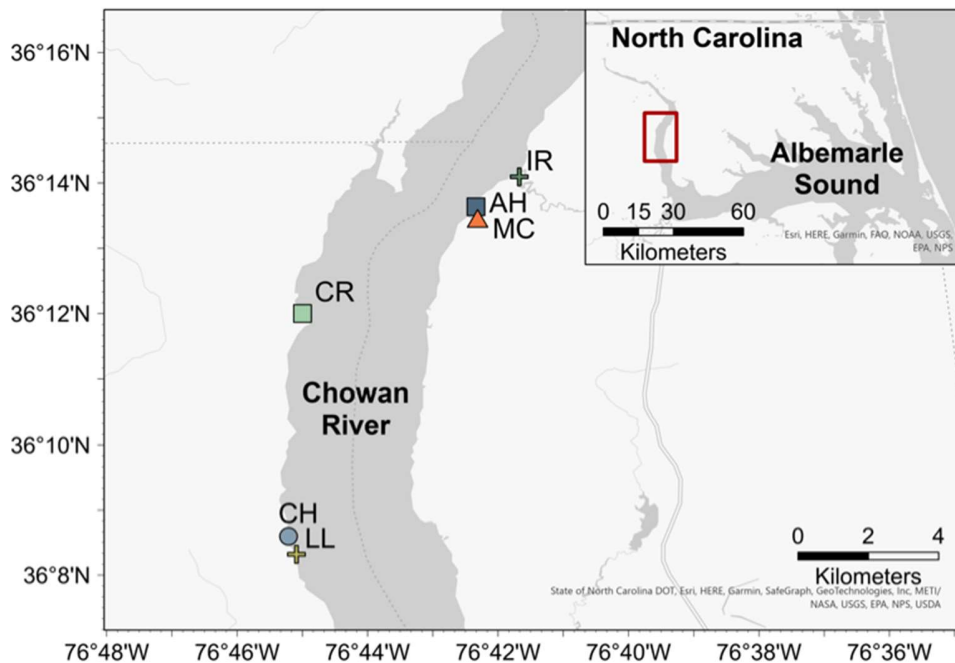

**Figure S1.** Map of sampling sites in Chowan River, NC (AH = Arrowhead; CR = Colerain; IC = Indian Creek; LL = Leary's Landing; MC = Modoc Canal; CP = Charlton Pier).
